# Supplementary material for: Structure and mechanism of the human NHE1-CHP1 complex
Source: PubMed Central journal article supplement (PMC8190280; doi:10.1038/s41467-021-23496-z), 2021-06-09
Supplement: 41467_2021_23496_MOESM1_ESM.pdf [file 41467_2021_23496_MOESM1_ESM.pdf]

Supplementary information for

[Structure and mechanism of the human NHE1-CHP1 complex](#)

Yanli Dong, Yiwei Gao, Alina Ilie, DuSik Kim, Annie Boucher, Bin Li, Xuejun C. Zhang, John Orłowski,  
and Yan Zhao

This file contains Supplementary Figure 1–9 and Supplementary Table 1–2.

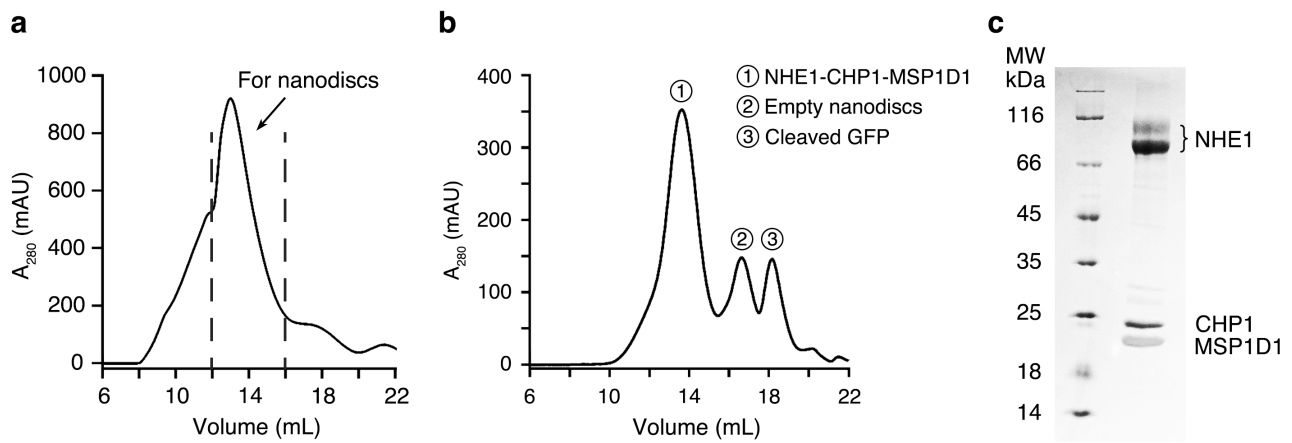

Supplementary Figure 1. Reconstitution of NHE1-CHP1 complex in nanodiscs.

**a.** Size-exclusion chromatogram (Superose 6 increase) of the purified sample of NHE1-CHP1 complex. Peak fractions (marked within black dashed lines) were used for nanodiscs reconstitution. **b.** Size-exclusion chromatogram of reconstituted NHE1-CHP1 complex into lipid nanodiscs. Peaks of NHE1-CHP1-MSP1D1 nanodiscs, empty nanodiscs, and cleaved GFP are indicated. **c.** Coomassie-blue-stained SDS-PAGE gel of the NHE1-CHP1-MSP1D1 nanodiscs. Components of the complex are labeled. NHE1 appeared in two bands due to different extent of glycosylation. The experiments were repeated independently with more than 3 times with similar results.

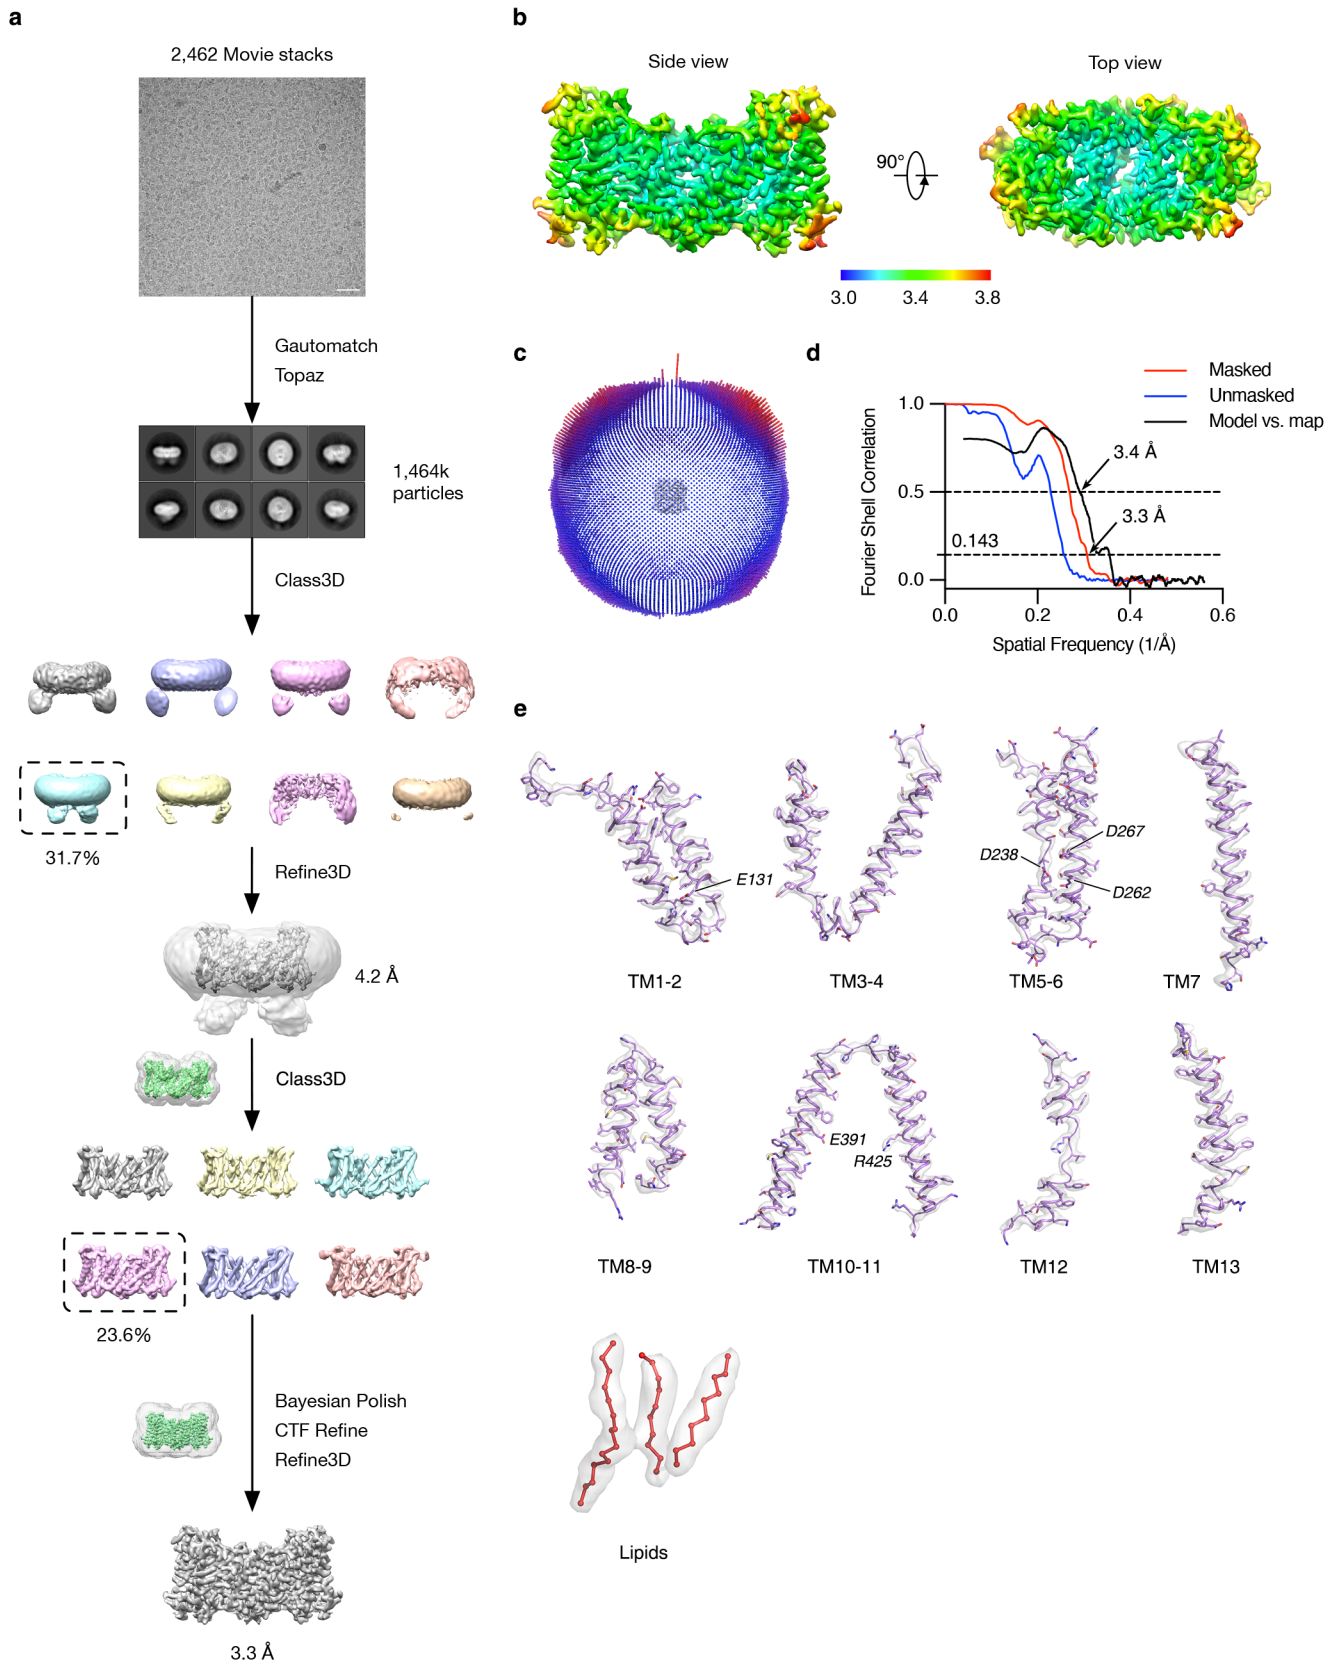

Supplementary Figure 2. Cryo-EM analysis of NHE1-CHP1<sup>Na/7.5</sup> complex.

**a.** Flow chart of cryo-EM data processing. A total of 2,462 movie stacks were collected (Bar = 40 nm). A representative motion-corrected micrograph of this dataset is shown here. Particles were picked using Gautomatch, Topaz, and Template Picker in cryoSPARC, and were then submitted to several rounds of 3D classification, Bayesian polish, and CTF and 3D-auto refinement. The resulting map was reported at 3.3 Å. The CHP1 density is weak due to conformational flexibility. The same map of the lower threshold (transparent) and the higher threshold were overlaid to show CHP1 and TM helices features, respectively. Masks used for 3D classification and refinement were also shown as transparent surfaces alongside the arrows. **b.** Sharpened map of the NHE1-CHP1<sup>Na/7.5</sup> complex, colored according to local resolution. **c.** Angular distribution of the particles contributing to the final reconstitution. The length of each spike indicates of the number of particles in the designated orientation. **d.** The half-map and model-map Fourier shell correlation (FSC) curves of NHE1-CHP1<sup>Na/7.5</sup> complex. **e.** Representative EM maps for the NHE1-CHP1<sup>Na/7.5</sup> complex as well as lipid molecules.

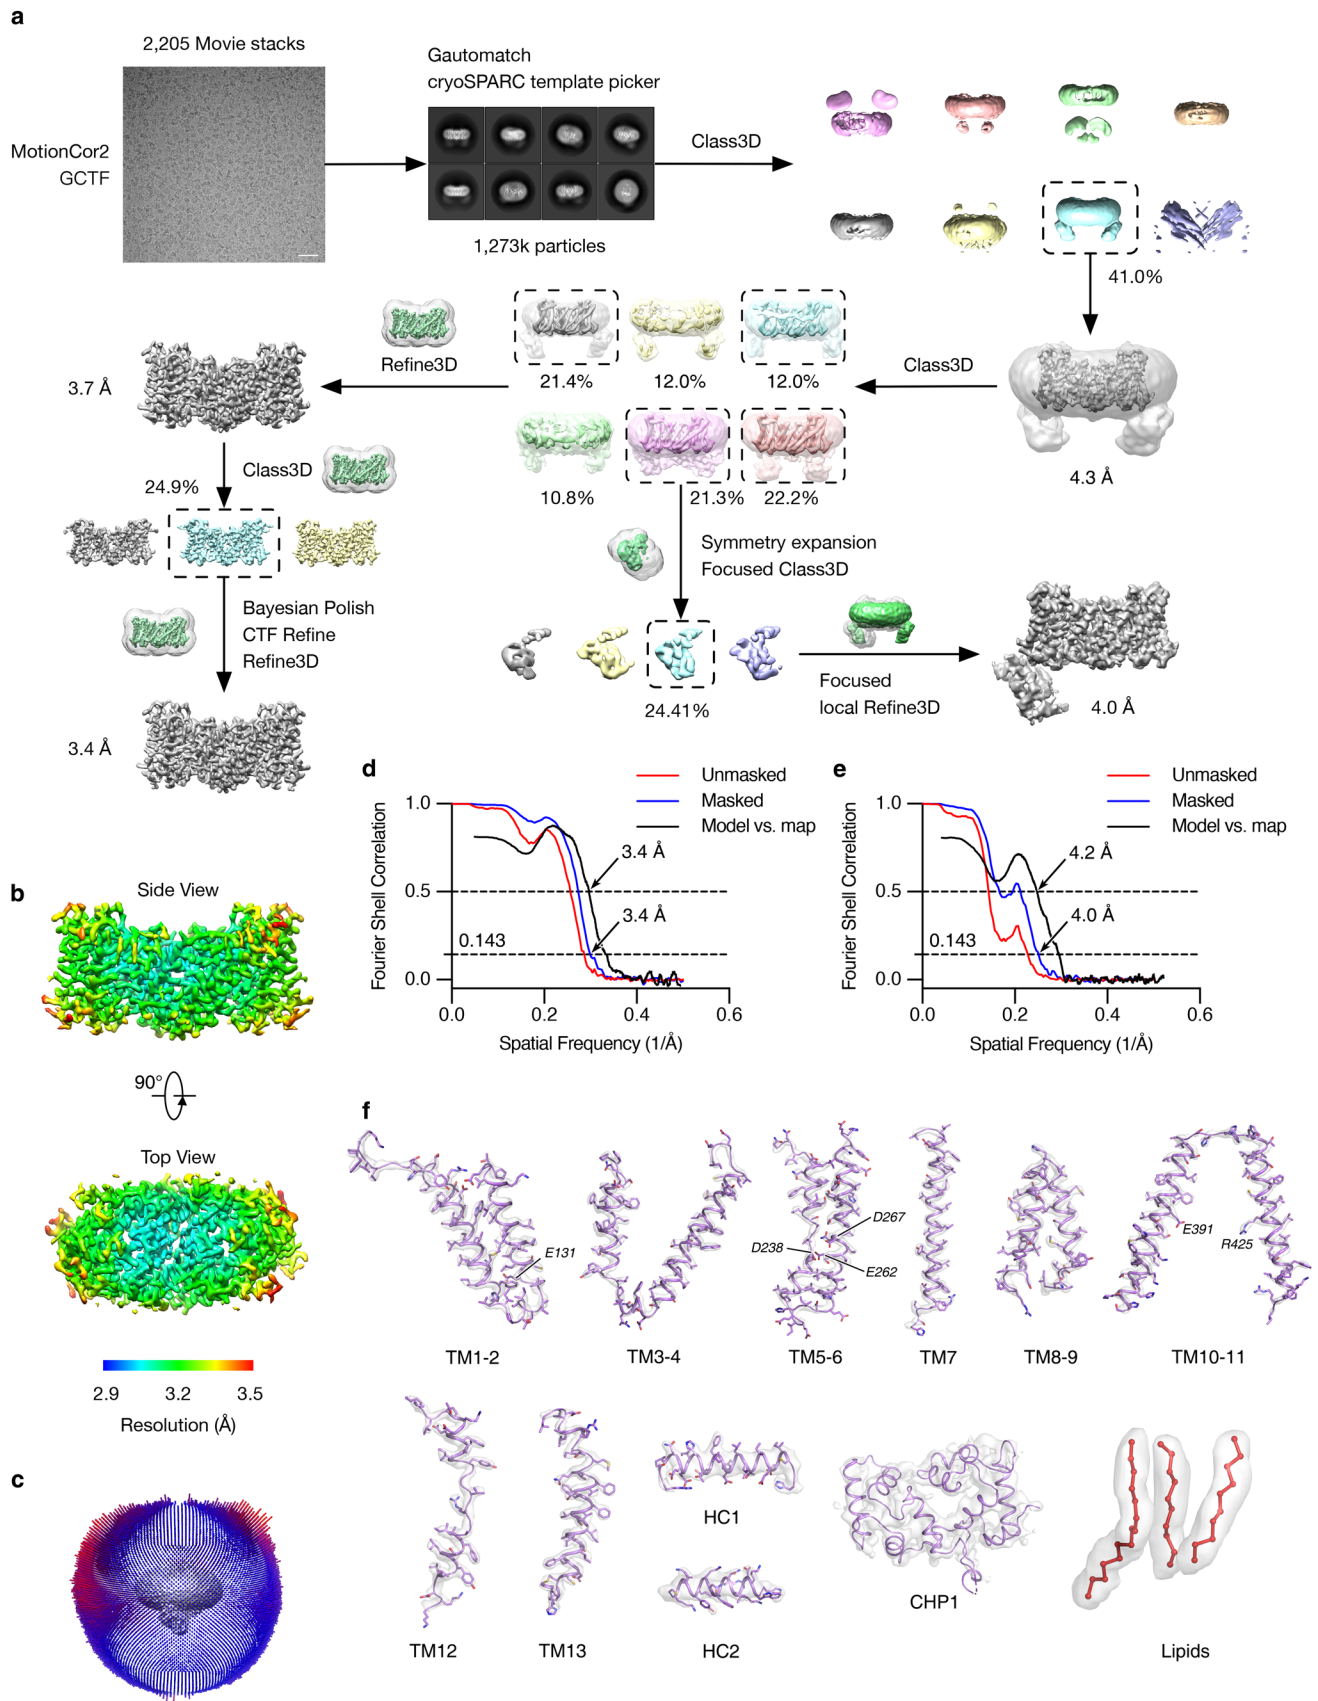

Supplementary Figure 3. Cryo-EM analysis of NHE1-CHP1<sup>Na/6.5</sup> complex.

**a.** Flow chart of cryo-EM data processing. A total of 2,205 movie stacks were collected and motion-corrected (Bar = 40 nm). A representative motion-corrected micrograph of this dataset is shown here. Particles were picked using Gautomatch and Template Picker in cryoSPARC. Junk particles were removed using several rounds of 2D and 3D classification. The NHE1-focused reconstruction yielded a map with a reported resolution of 3.4 Å. The CHP1-focused classification resulted in a 4.0-Å map, composed of the NHE1 dimer and one CHP1 molecule. The same maps of the lower threshold (transparent) and the higher threshold were overlaid to show CHP1 and TM helix features, respectively. Masks used for 3D classification and refinement were also shown as transparent surfaces alongside the arrows. **b.** Sharpened map of the NHE1-CHP1<sup>Na/6.5</sup> complex, colored according to local resolution estimation. **c.** Angular distribution of particles used in the final reconstruction. The length of each spike indicates of the number of particles in the designated orientation. **d–e.** FSC curves of the NHE1 dimer and NHE1-CHP1 complex, respectively, calculated between two independently refined half-maps before (red) and after (blue) post-processing, overlaid with an FSC curve calculated between the cryo-EM density map and the structural model shown in black. **f.** Representative EM maps for the NHE1-CHP1<sup>Na/6.5</sup> complex.

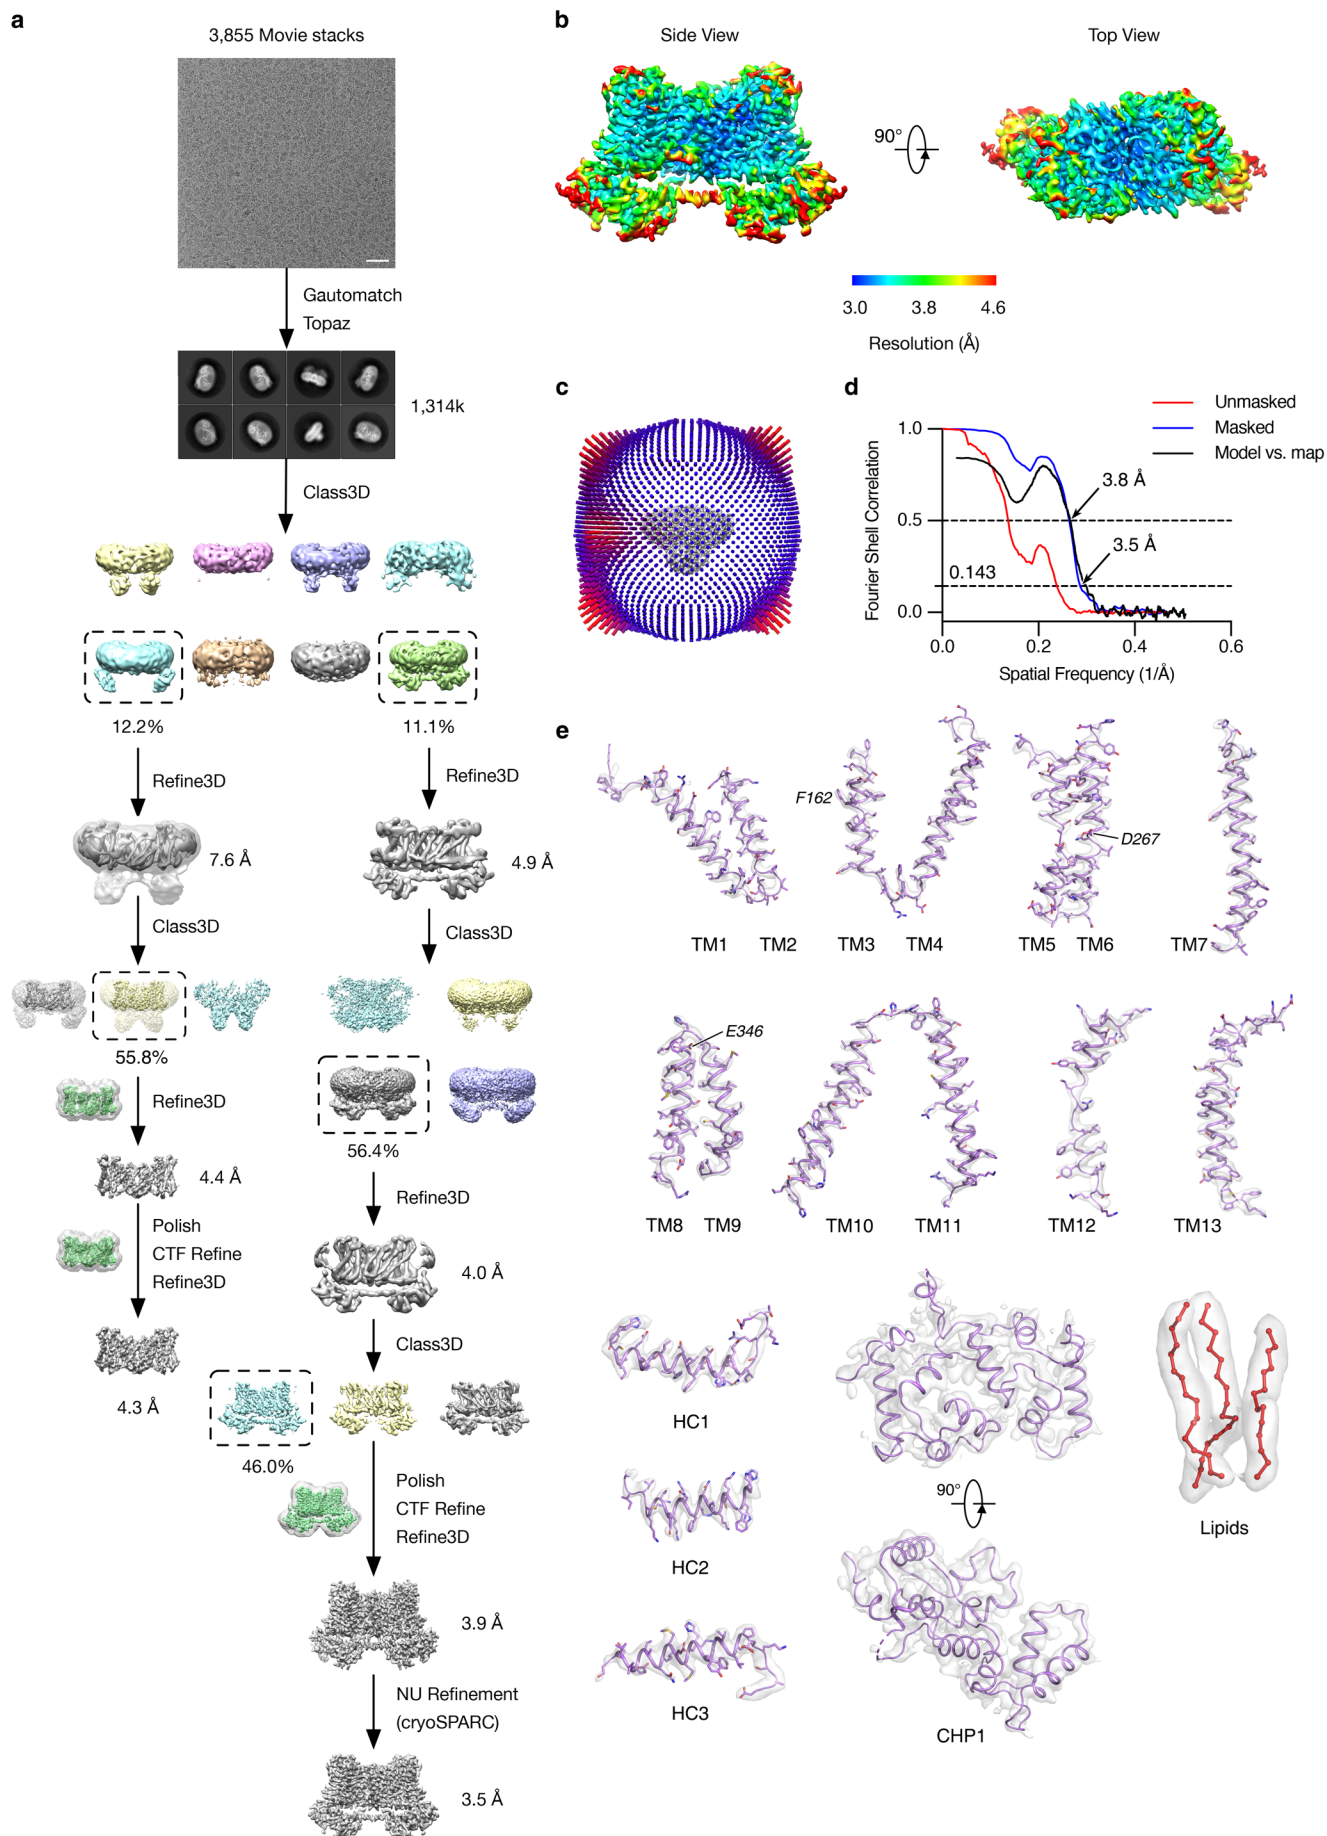

Supplementary Figure 4. Cryo-EM analysis of NHE1-CHP1<sup>K/cariporide</sup> complex.

**a.** Flow chart of cryo-EM data processing. A total of 3,855 movie stacks were collected (Bar = 40 nm). A representative motion-corrected micrograph of this dataset is shown here. Particles were picked using Gautomatch and Topaz, and was subjected to 3D classification. One of the resulting class displayed a discernable shape of CHP1 and was thus selected and submitted to further 3D classification, Bayesian Polish, CTF refinement and 3D auto refinement. The resulting map was reported at 3.6 Å. Masks used for 3D classification and refinement were shown as transparent surfaces alongside the arrows. **b.** Sharpened map of NHE1-CHP1<sup>Na/7.5</sup> complex, colored according to local resolutions. **c.** Angular distribution of the particles contributing to the final reconstitution. The length of each spike indicates of the number of particles in the designated orientation. **d.** The half-map and model-map FSC curves of the NHE1-CHP1<sup>K/cariporide</sup> complex. **e.** Representative EM maps for the NHE1-CHP1<sup>Na/7.5</sup> complex and lipid molecules.



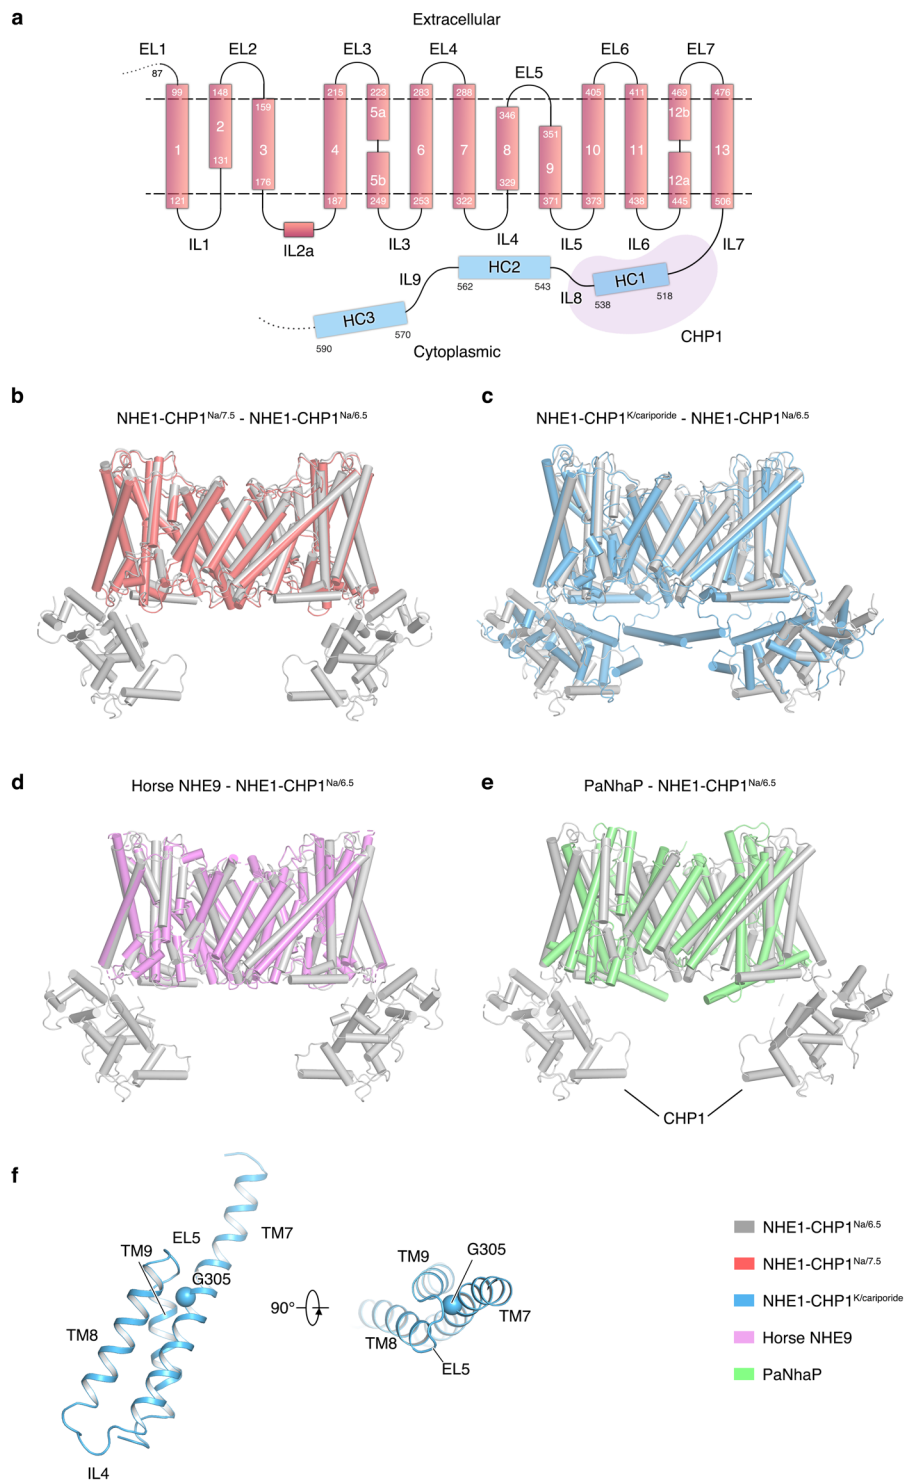

Supplementary Figure 5. Architecture of the NHE1-CHP1 complex.

**a.** A topology model of secondary structures of the NHE1-CHP1 complex. **b.** Superposition of the complex structures of NHE1-CHP1<sup>Na/6.5</sup> (grey) and NHE1-CHP1<sup>Na/7.5</sup> (red). **c.** Structural comparison of the NHE1-CHP1<sup>K/cariporide</sup> (blue) and NHE1-CHP1<sup>Na/6.5</sup> (grey) complexes. **d.** Structural comparison of the NHE1-CHP1<sup>Na/6.5</sup> and horse NHE9 (PDB ID: 6Z3Z), which colored in grey and magenta, respectively. **e.** Structural

comparison of the NHE1-CHP1<sup>Na/6.5</sup> complex with PaNhaP (PDB ID: 4CZA). The NHE1-CHP1<sup>Na/6.5</sup> complex and PaNhaP are colored in grey and green, respectively. **f.** TM helix bundle composing of TMs 7–9. G305 is shown as a sphere.

hNHE1 1 -----MVLRSGLGSPHRIFPSLIVVVALVGLLPLVLRSHGLQLSPTASTIRSSÉPPRERSIGDVTTAPPEVTPÈSRPVNHSVTDH  
hNHE2 1 -----MEPLGN---WRSLRAPLPPMLLLLLLQVAGVPGALAEITLLNAPRAMGTSSSPSPASVVPAGTTLFEESR-----  
hNHE3 1 -----MWGLGARGPDRGLLLALAGCLARAG-----GVEVEPPGAGHESGG-----  
hNHE4 1 -----MALQM---FVTY-SPWNCLLLVALECEASSDLNESAN-----STAQYASNAWFAAASSEPEEG-----  
hNHE5 1 -----MLRAALS-----LLALPLAGAAEEP-----TQKPESPGEP--PPG-----  
hNHE6 1 MARRGWRRAPLRRGVGSSPRARRLMRPLWLLAVGVFDWAGASD-GGGGEARAMDEEIVSEKQAEESHRODSANLLIFILLTLT-----  
hNHE7 1 MEPGDAARPGSGRATGAPP-PRLLLLPLLLGWGLRVAAAASASSGAAEDSSAMEELATEKEAEESHRODSVSLTFLILLTLT-----  
hNHE8 1 -----MGEKMAEERFPNTTHEGFNVTLHTTLVVTTKLVLPPTPKPILPVQTG-----  
hNHE9 1 MER-----QSRVMSEKDEYQFQHQGAVELLVFNFLILT-----  
MjNhaP1 1 -----  
PaNhaP 1 -----

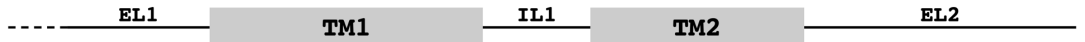

hNHE1 82 GMKPRKAFVPLGIDYTHVTRTPFEISLWILLACLMIKGFHVPTISSIVPESCLLIVVGLLVGGLIKGVG-ETPP-----  
hNHE2 67 -----LPVFTLDYPHVQIPFEITLWILLASLAKIGFHLVHKLPTIVPESCLLIMVGLLLGGIIFGVDEKSP-----  
hNHE3 41 -----FQVVTFEWAHVQDPVIALWILVASLAKIGFHLVSHKVTSVVPESALLIVLGLVGGIVWAADHIAF-----  
hNHE4 56 -----ISVFELDYDVQIPYEVTLWILLASLAKIGFHLVHRLPGLMPESCLLILVGLVGGIIFGTDHKSPP-----  
hNHE5 33 -----LELFRWQWHEVEAPYLVALWILVASLAKIVFHLVSRKVTSLVPESCLLILVGLVGGIVLAVAKAEY-----  
hNHE6 84 -----ILTIWLFKRRRFLHETGLAMIYGLLVGLVLRVYGHVPSDVMNVTLVSCVQS-SPTTLV-----  
hNHE7 84 -----ILTIWLFKRRRFLHETGLAMIYGLVGVILRYGTPATSGRD-KSLVCTQEDRAPSTLLVNVSGKFFEYTLKGEISPGKINSV  
hNHE8 48 -----EQAQQEEQSSGMTIFFSLLVLAICIIIVHLLIRYRLH-FLPESVAVVSLGILMGAVIKIEFKKLAN-----  
hNHE9 34 -----ILTIWLFKRRRFLHETGGAMVYGLIMGLILRYATAPTDIESGTVYDCVKTLPSTLLVNVITDQVYKYKREISQHNINPH  
MjNhaP1 1 -----MELMAIGLGLVALVGLVLRVYGHVPSDVMNVTLVSCVQS-SPTTLV-----  
PaNhaP 1 -----MIELSLAEALFLILFTGVISMLISRRTG--ISYVPIFILTGLVIGPLKLIIPRDLA-----

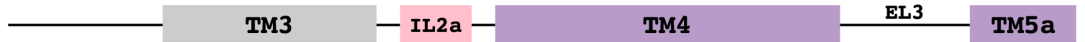

hNHE1 154 -----FLQSDVFFLFLPPILDAGYFLPLRQFTENLGTILIFAVVGTWNAFFLGGMLYAVCLVG---GEQ-INNIGLLDNLLFG  
hNHE2 134 -----AMKTDVFFLYLLPPIVLDAGYFMPTRPFENIGTIFWYAVVGTWNSIGIGVSLFGICQIE---AFG-LSDITLLQNLFFG  
hNHE3 108 -----TLTPVFFFYLLPPIVLDAGYFMPNRLFNGLTILLYAVVGTWNAATGLSGLYGVFLSG---LMG-DLQIGLLDFLLFG  
hNHE4 123 -----VMDSSIFLYLLPPIVLEGGYFMPTRPFENIGSILWAVLWALINALGIGLSLYLICQVK---AFG-LGDVNLQNLFFG  
hNHE5 100 -----QLEPGTFFLFLPPIVLDAGYFMPNRLFNDLGAITYAVVGTWNAFTTGAALWGLQQAG---LVAPRVQAGLLDFLLFG  
hNHE6 144 -----TFDPEVFFNILLPPIIFYAGYSLKRRHFRNLGSIILAYAFGLTAISCFVIGSIMYGCVTLMKVTVGOLA-GDFYFTDCLLFG  
hNHE7 168 EQNDMLRKVTFDPEVFFNILLPPIIFHAGYSLKRRHFRNLGSIILAYAFGLTAISCFVIGSIMYGCVTLMKVTVGOLA-GDFYFTDCLLFG  
hNHE8 114 -----WKEEMFRPNMFFLLPPIIFESGYSLKGNFQONIGSITLFAVFGTAISAFVVGGLYIFLQAD---VISKLNMTDSFAFG  
hNHE9 119 QGNAILEKMTDFPEIFFNVLLPPIIFHAGYSLKRRHFRNLGSIILAYAFGLTAISCFVIGSIMYGCVTLMKVTVGOLA-GDFYFTDCLLFG  
MjNhaP1 55 -----EIFEYAGPIGLIFILLGGAFTMRIISLKRVIKTVVRLDITLITLISGFIENMVNLNP-----YTPVGYLFG  
PaNhaP 55 -----EIFDFVRVFLVILFTEGNHLSWRLLKKNMPTIVTLDTITGLILTALIAGFIFKVVVFN-----SFLGLFLFG

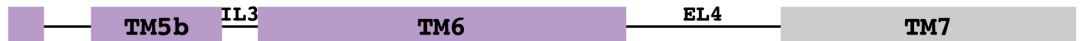

hNHE1 232 SIISAVDPVAVLAVFEEIHINELLHILVFCESLLNDAVTVVLYHLFEEFANYE-----HVGIVDIFLGFSLFFVVALGGVLVGVVY  
hNHE2 212 SLISAVDPVAVLAVFENIHVNEQLYILVFCESLLNDAVTVVLYNLFKSFQCMK-----TIETIDVFAGIANFFVVGIGGVLIIGIFL  
hNHE3 186 SLMAAVDPVAVLAVFEEHVNVNLFIIIVFCESLLNDAVTVVLYNVFESFVALGG-----DNVTGVDVCKGIVSFFVVSLLGGTVLVGVV  
hNHE4 201 SLISAVDPVAVLAVFEEARVNEQLYIMNIFCEALLNDGITVLYNMLIAFTKMHKF-----EDIEVVDILAGCARFIVVGLGGVLFVIVF  
hNHE5 179 SLISAVDPVAVLAVFEEHVNETLFIIVFCESLLNDAVTVVLYKVCNSFVEMGS-----ANVQATDYLKGVASLFFVVSLLGGAAGVLF  
hNHE6 225 AIVSATDPVTVLAIFHELQVDVELYALLFCESVLNDAVAIVLSSIVAYQPAGDN-----SHTFDVTAMFKSIGIFLGFSGSFAMGAAT  
hNHE7 257 AIISATDPVTVLAIFNELHADVDLYALLFCESVLNDAVAIVLSSIVAYQPAGLNTHA-----FDAAAFKSVGIFLGFISGFSFTMGAVT  
hNHE8 195 SLISAVDPVATIAIFNALHVDVPLNMLVFCESILNDAVSIIVLNTAEGLTRKNMSDVS-----GWQTFLOALDYFLKMFVGSAAALGTLT  
hNHE9 209 SLMSATDPVTVLAIFHELHVDPDLYTLFFCESVLNDAVAIVLTYISISISYSPK-ENPNA-----FDAAAFQSVGNFLGIFAGSFAMGSAY  
MjNhaP1 126 AITAAATDPATLIPVFSRVRTNPEVAITLEAESIFNDPLGIVSTSVILGLFG-----LFSSSNPLIDLITLAGGAIIVVGLLL  
PaNhaP 124 AIIGATDPATLIPFRQYRVKQDIETVIVTESIFNDPLGIVLTLIAISMLVPGYGGGIFSTLSEKLGIIYAGGVIIYFLYVSVSISLGIPL

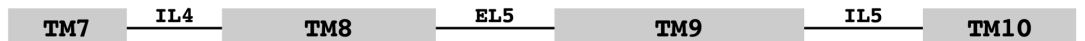

hNHE1 313 GVIAAFTSRFTSH--IRVIEPLFVFLYSYMAVLSAELFH-----LSGIMALIASGVVMPRYVEANI-----SHKSHTTIKYFLKM  
hNHE2 293 GFIAAFTTRFTHN--IRVIEPLFVFLYSYLSYITAEFMH-----LSGIMAITACAMTMKYVEENV-----SQKSYTTIKYFMKM  
hNHE3 269 AFLLSLVTRFTKH--VRIIEPGVFVFIISYLSYLTSEMLS-----LSAILAITFCGICQKVKVANI-----SEQSATVRYTMKM  
hNHE4 285 GFISAFITRFTQN--ISAIEPLIVFMFSYLSYLAETLY-----LSGILAITACAVTMKKYVEENV-----SQTSYTTIKYFMKM  
hNHE5 262 AFLLLATTRFTKR--VRIIEPLLVFLAYAAVLAEMAS-----LSAILAVTMCGLGCKKYVEANI-----SHKSRRTVKYTMKT  
hNHE6 310 GVVTLVTKFTKLEFQLETFGLFFLMSWSTFLLAEAWG-----FTGVVAVLFCGITQAHYTYNNL-----STESQHRTKQLFEL  
hNHE7 342 G-VNAVTKFTKLCFPLELETALFFLMSWSTFLLAECG-----FTGVVAVLFCGITQAHYTYNNL-----SVESRSRTKQLFEV  
hNHE8 279 GLISALVLRKIDLRKTPSLEFGMMIFAYLPGLAEGIS-----LSGIMAILFSGIVMSHYTHHNL-----SPVTQILMQTLRT  
hNHE9 293 AIITALLTKFTKLCFPMLETGLFFLWSAFLSAEAG-----LTGIVAVLFCGVTQAHYTYNNL-----SSDSKIRTKQLFEF  
MjNhaP1 202 AKIYEKIIEHCDPHEY--VAPLVLGAMLLLYVGDLLPSICGYGFSGVNAVIMGLVLDALFRADD-----IDYKIVSFCDD  
PaNhaP 214 GILGYKFKRTGIFDFPEIEAFSLSLAFLGFFIGERLD-----ASGYVAVTVTGIVLGNKLLKPRENIRILKRLQRAIEKEVHFNDT

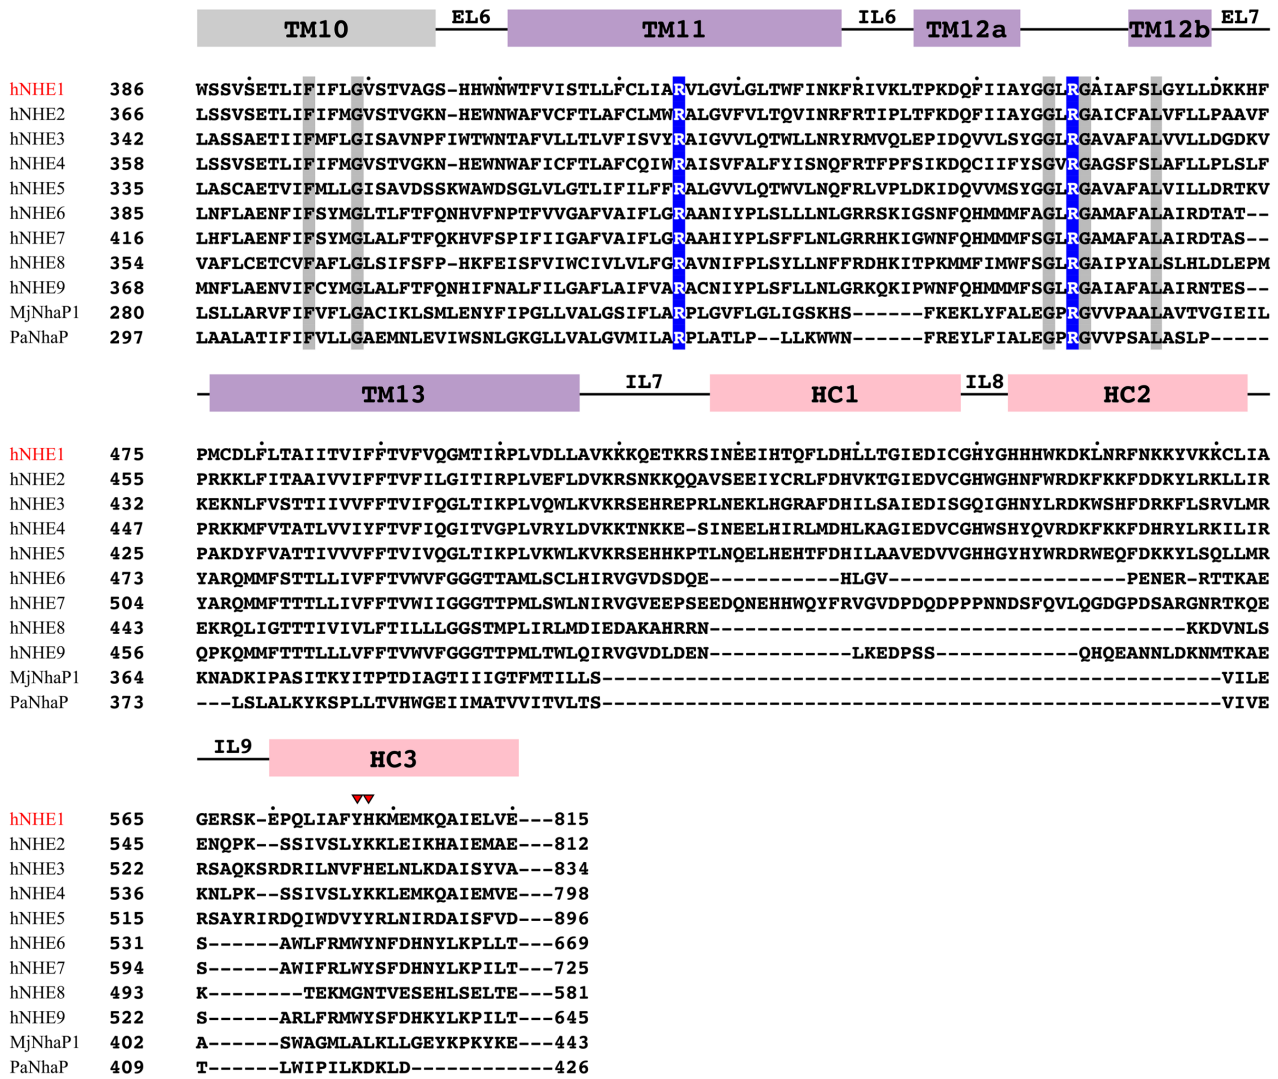

Supplementary Figure 6. Sequence alignment of sodium/proton exchangers.

Secondary structural elements of hNHE1 are marked above the sequence alignment, and unmodeled loops are represented as dashed lines. Helices of the dimerization domain, core domain, and from cytoplasmic region are colored in grey, purple, and pink. Mutation sites are marked as red triangles. Conservative residues among these proteins are highlighted in red, blue and grey for acidic, basic, and others, respectively.

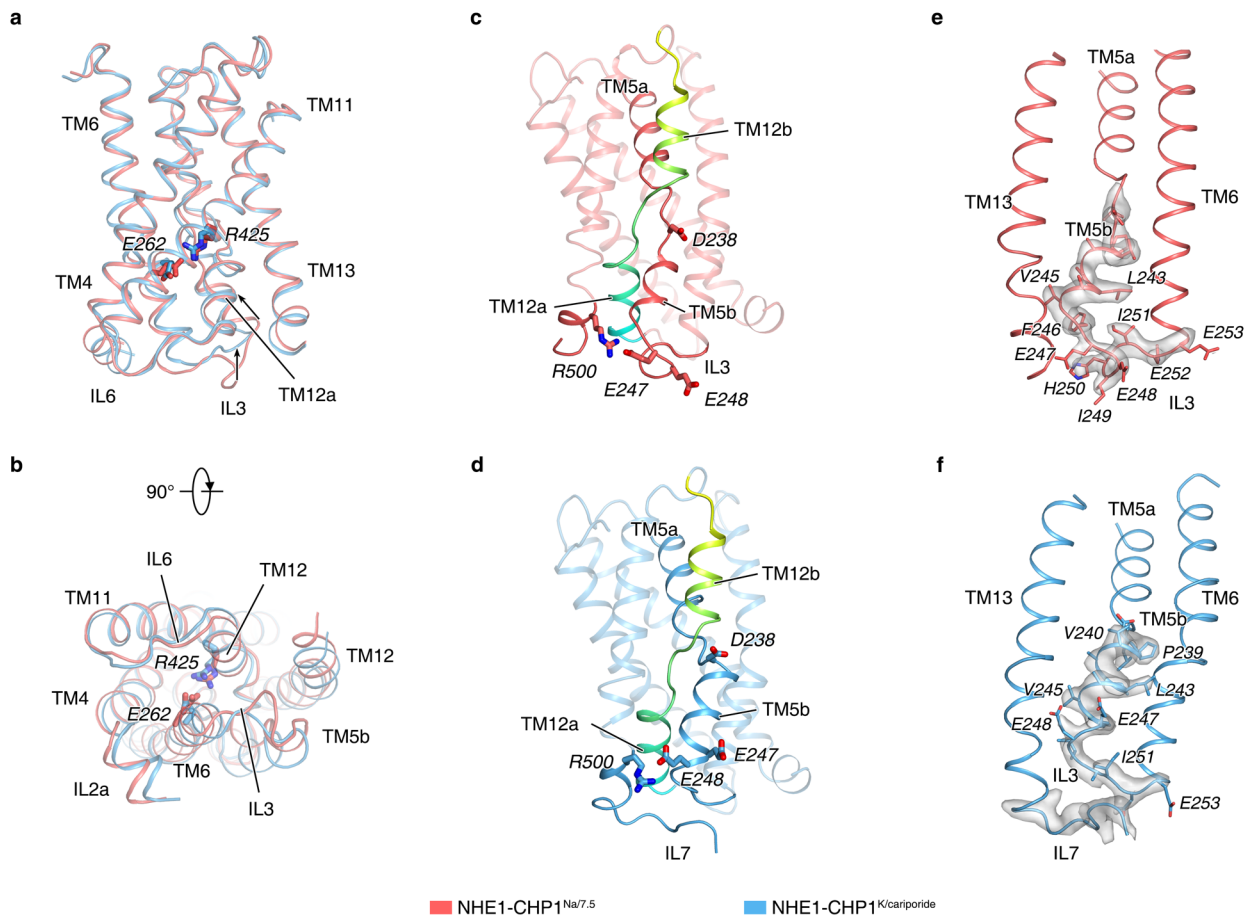

### Supplementary Figure 7. Structural analysis of core domains.

**a–b.** Structural comparison of the core domains viewed parallel to the membrane and from the intracellular side of the membrane, respectively. The core domain of NHE1-CHP1<sup>Na/7.5</sup> complex and NHE1-CHP1<sup>K/cariporide</sup> complex are colored in red and blue, respectively. Sidechains of the E262 and R425 are shown in sticks. **c–d.** Closeup view of the model around TM5b and IL3 in the inward- and outward-facing conformations, respectively. Selected residues D238, D247, D248, and R500 are shown as sticks. TM12 is colored in a cyan-to-green spectrum. **e–f.** Local structures of TM5b, TM6, TM13, IL3, and IL7 in NHE-CHP1<sup>Na/7.5</sup> complex (**e**) and NHE1-CHP1<sup>K/cariporide</sup> (**f**). The corresponding densities of TM5b, IL3, and IL7 are shown in transparent grey surface.

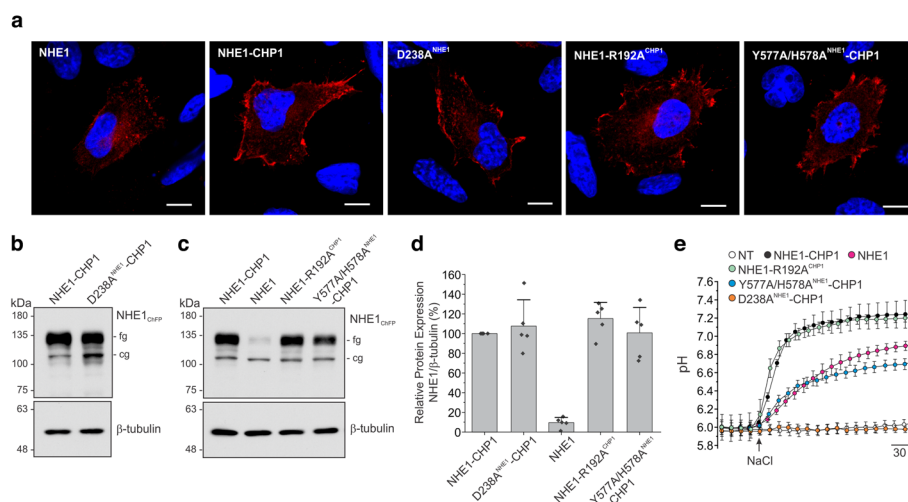

### Supplementary Figure 8. Biochemical and functional analysis of NHE1-CHP1 complex.

**a.** Cellular distribution of NHE1 in AP-1 cells. AP-1 cells were transiently transfected (48 h) with wild-type NHE1 tagged at its C-terminus with mCherry fluorescent protein alone or wild type or mutant NHE1 co-expressed with either wild-type CHP1 or mutant CHP1 (R192A<sup>CHP1</sup>), as indicated. Scale bars represent 10  $\mu$ M. Images are representative of at least 6 different cells from two independent transfections. **b–c.**

Assessment of protein expression of NHE1. Blots were stripped and reprobed with a mouse monoclonal anti- $\beta$ -tubulin antibody to control for protein loading. Blots are representative images from five separate experiments. **d.** Quantitation of protein expression was determined by densitometry of X-ray films exposed within the linear range of the films. To control for subtle loading variations, NHE1 expression determined relative to endogenous  $\beta$ -tubulin (ratio of NHE1/ $\beta$ -tubulin) and then normalized to 100%. Values represent the mean  $\pm$  S.D. (n = 5 independent blots). **e.** Measurement of cytoplasmic pH following an NH<sub>4</sub>Cl-imposed acid-load in AP-1 cells transfected with NHE1 and CHP1. NHE1 activity was defined as the initial linear rate of pH recovery as a function of time upon reintroduction of Na<sup>+</sup>-rich solution. Tracings are a representative experiment (mean  $\pm$  S.E.M.; NT, n = 8 cells; NHE1, n = 3 cells, NHE1-CHP1, n = 4 cells; D238A<sup>NHE1</sup>-CHP1, n = 4 cells; NHE1-R192A<sup>CHP1</sup>, n = 4; Y577A/H578A<sup>NHE1</sup>-CHP1, n = 5 cells) of 2 or 3 independent experiments. Source data are provided as a Source Data file.

NT, n = 8 cells; NHE1, n = 3 cells, NHE1-CHP1, n = 4 cells; D238A<sup>NHE1</sup>-CHP1, n = 4 cells; NHE1-R192A<sup>CHP1</sup>, n = 4; Y577A/H578A<sup>NHE1</sup>-CHP1, n = 5 cells) of 2 or 3 independent experiments. Source data are provided as a Source Data file.

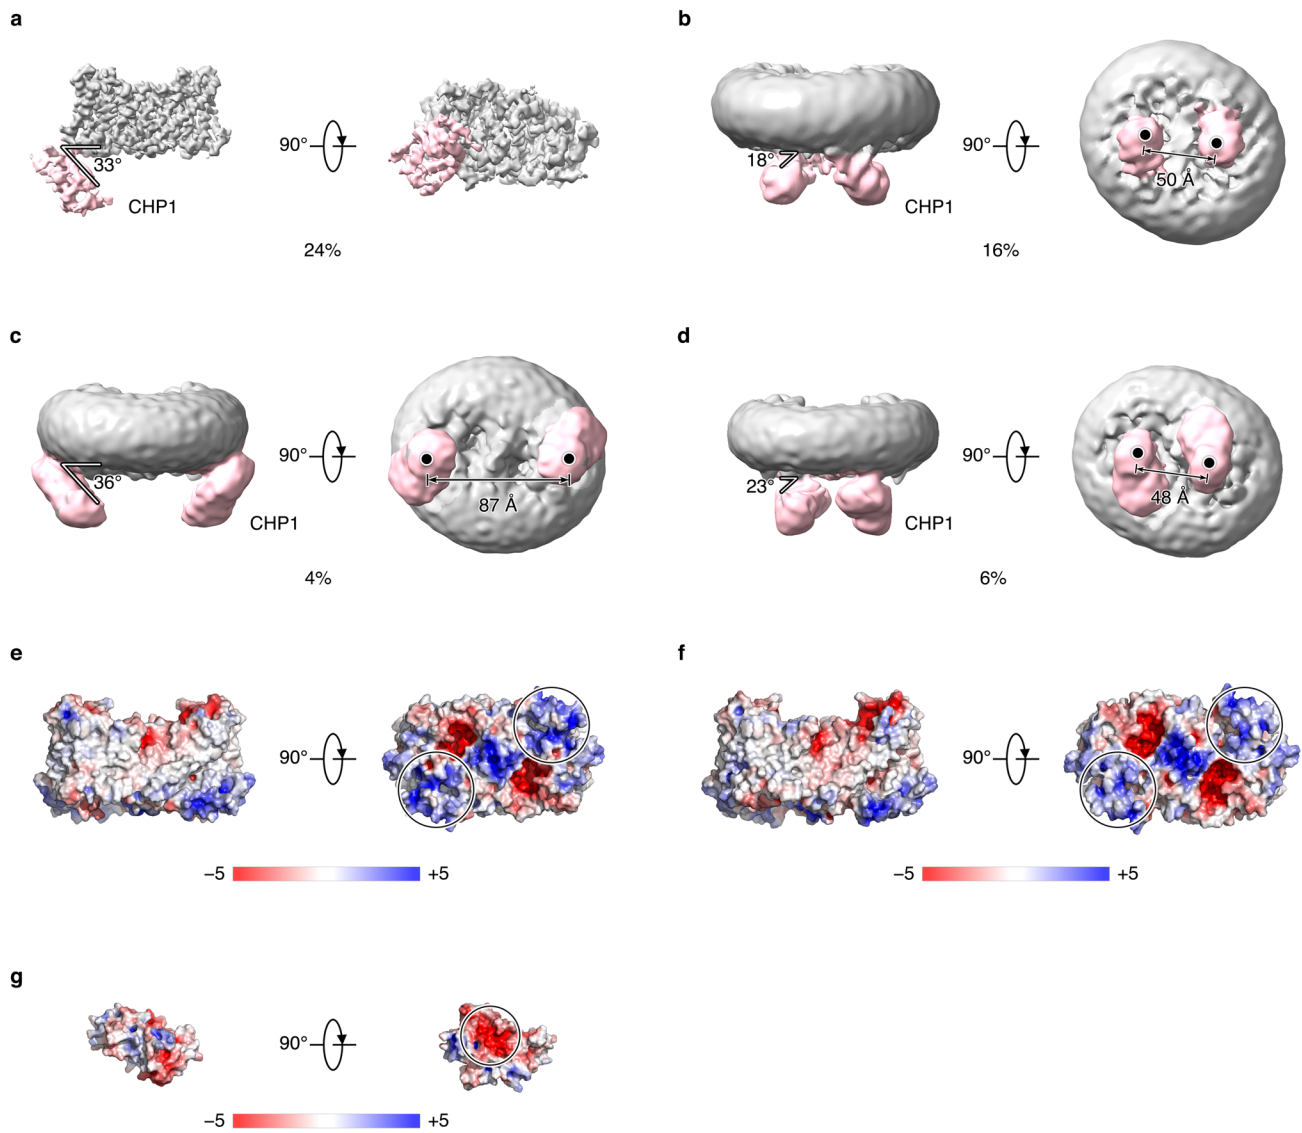

Supplementary Figure 9. Conformational heterogeneity and electrostatic potentials of the NHE1-CHP1 complex.

**a–d.** Representative conformations of CHP1 (pink) in the NHE1-CHP1<sup>Na/6.5</sup> complex (**a–b**) and NHE1-CHP1<sup>Na/7.5</sup> complex (**c–d**). **e–g.** The electrostatic potentials of NHE1 in NHE1-CHP1<sup>Na/6.5</sup> complex (**e**) and NHE1-CHP1<sup>K/cariporide</sup> complex (**f**). **g.** The electrostatic potential of CHP1. The NHE1 and CHP1 interaction areas are marked.

Supplementary Table 1. Cryo-EM data collection, processing and model validation.

|                                       | NHE1-CHP1 <sup>Na/7.5</sup> complex | NHE1-CHP1 <sup>Na/6.5</sup> complex | NHE1-CHP1 <sup>K/cariporide</sup> complex |
|---------------------------------------|-------------------------------------|-------------------------------------|-------------------------------------------|
| Accession                             |                                     |                                     |                                           |
| PDB ID                                | 7DSW                                | 7DSV                                | 7DSX                                      |
| EMDB Accession                        | EMD-30848                           | EMD-30847                           | EMD-30849                                 |
| Data Collection                       |                                     |                                     |                                           |
| Microscope                            | Titan Krios                         | Talos Arctica                       | Titan Krios                               |
| Camera                                | K2 Summit                           | K2 Summit                           | K2 Summit                                 |
| Voltage (kV)                          | 300                                 | 200                                 | 300                                       |
| Magnification                         | 130,000 ×                           | 130,000 ×                           | 130,000 ×                                 |
| Pixel Size (Å)                        | 1.04                                | 1                                   | 1.04                                      |
| Defocus Range (µm)                    | -1.2 ~ -2.2                         | -1.2 ~ -2.2                         | -1.2 ~ -2.2                               |
| Energy Filter Slit Width (eV)         | 20                                  | 20                                  | 20                                        |
| Total Dose (e/Å <sup>2</sup> )        | 60                                  | 50                                  | 60                                        |
| Micrographs (No.)                     | 2,462                               | 2,205                               | 3,855                                     |
| Final Particles (No.)                 | 108,712                             | 100,503                             | 61,460                                    |
| Map Resolution (Å)                    | 3.3                                 | 3.4                                 | 3.5                                       |
| Model Validation                      |                                     |                                     |                                           |
| Number of Atoms                       | 6,736                               | 6,768                               | 10,982                                    |
| Residues                              | 840                                 | 840                                 | 1,370                                     |
| Ligands                               | N/A                                 | N/A                                 | Cariporide                                |
| Sharpening B-factor (Å <sup>2</sup> ) | 131                                 | 175                                 | 84                                        |
| R. M. S. Deviations                   |                                     |                                     |                                           |
| Bond Lengths (Å)                      | 0.006                               | 0.006                               | 0.009                                     |
| Bond Angles (°)                       | 0.779                               | 0.77                                | 1.046                                     |
| Ramachandran                          |                                     |                                     |                                           |
| Favored (%)                           | 91.87                               | 92.34                               | 91.16                                     |
| Allowed (%)                           | 8.13                                | 7.66                                | 8.84                                      |
| Outlier (%)                           | 0.00                                | 0.00                                | 0.00                                      |
| MolProbity                            | 2.27                                | 2.11                                | 2.31                                      |
| EMRinger                              | 1.35                                | 1.54                                | 1.96                                      |
